# Supplementary material for: Supramolecular gel formation and self-correction induced by aggregation-driven conformational changes
Source: Royal Society of Chemistry journal article supplement (doi:10.1039/b816234d), 2008-11-14
Supplement: b816234d.pdf [file b816234d.pdf]

## **Supramolecular Gel Formation and Self-correction Induced by Aggregation-driven Conformational Changes**

Francisco Rodríguez-Llansola,<sup>a</sup> Juan F. Miravet<sup>a\*</sup> and Beatriu Escuder<sup>a\*</sup>  
*Dpt. Química Inorgànica i Orgànica, Universitat Jaume I, 12071 Castelló, Spain*

### *Electronic Supporting Information*

|                                                                   |    |
|-------------------------------------------------------------------|----|
| - Synthetic procedures and characterization of new compounds..... | 2  |
| - SEM images of xerogels and solids.....                          | 18 |
| - VT and concentration dependent NMR.....                         | 20 |
| - NOE experiments.....                                            | 22 |
| - WAXD graphs.....                                                | 25 |
| - Molecular modelling.....                                        | 27 |

### Synthetic procedures:

Preparation of diamino amides shown below has been previously reported<sup>1</sup>:

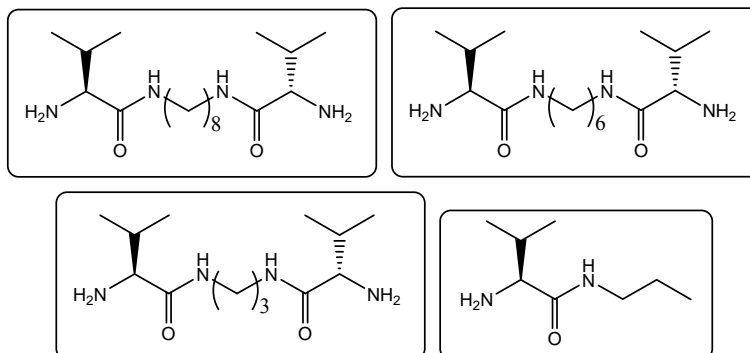

### General procedure for the preparation of N-Boc-protected compounds 1a-c:

A solution of diamino amide (5.51 mmol) in 100 mL of dry DME was added dropwise over a solution of Boc-L-Pro-OSuc (11.50 mmol) in 100 mL of dry DME. The mixture was stirred at room temperature for 24 h and then at 40 °C for 5 h. Solvent was evaporated under vacuum and the resulting white solid was dissolved in 50 mL of dichloromethane and washed with NaHCO<sub>3</sub> (3 x 15 mL). Afterwards the organic layers were dried (Na<sub>2</sub>SO<sub>4</sub>) and the solvent was evaporated under vacuum to yield N-Boc-protected **1a-c** as a white solids.

### N-Boc-protected 1a

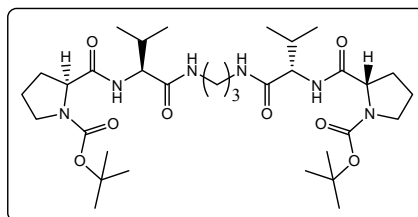

Yield 89 %; m.p. 163 °C; IR (KBr)  $\nu$  = 3303, 2970, 2876, 1702, 1649, 1545 cm<sup>-1</sup>; <sup>1</sup>H NMR (500 MHz, DMSO-d<sub>6</sub>):  $\delta$  = 0.89 (12 H, br, m), 1.34-1.54 (20H, br, m), 1.76-2.12 (10H, br, m), 3.03-3.23 (4H, br, m), 3.30-3.48 (4H, br, m), 4.11 (2H, dd, J = 8.7, 7.9 Hz), 4.20-4.31 (2H, br, m), 7.72 (2H, br, d, J = 7.8 Hz), 7.90-8.08 (2H, br, m) ppm; <sup>13</sup>C NMR (300 MHz, DMSO-d<sub>6</sub>):  $\delta$  = 19.157, 19.904, 23.657, 28.670, 29.830, 31.295, 31.790, 36.901, 47.224, 58.599, 60.125, 79.099, 154.055, 171.411, 172.868 ppm. ESI-MS (*m/z*) = 335.3 [M + 2H]<sup>2+</sup>, 667.6 [M + H]<sup>+</sup>, 689.6 [M + Na]<sup>+</sup>, 705.5 [M + K]<sup>+</sup>.

### N-Boc-protected 1b:

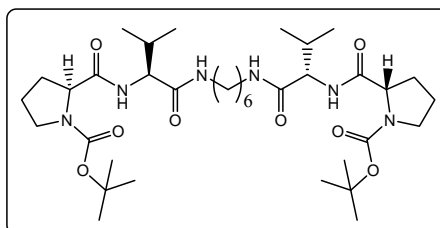

Yield = 83 %; m.p. 173 °C; IR (KBr)  $\nu$  = 3299, 2968, 2874, 1702, 1647, 1545 cm<sup>-1</sup>; <sup>1</sup>H NMR (500 MHz, DMSO-d<sub>6</sub>):  $\delta$  = 0.89 (12 H, br, m), 1.26-1.52 (26H, br, m), 1.76-2.21 (10H, br, m), 3.02-3.18 (4H, br, m), 3.30-3.47 (4H, br, m), 4.13 (2H, dd, J = 8.1, 7.9 Hz),

<sup>1</sup> Becerril, J; Bolte, M.; Burguete, M.I.; Galindo, F.; García-España, E.; Luis, S.V.; Miravet, J.F. *J. Am. Chem. Soc.* **2003**, *125*, 6677-6686.

4.20-4.31 (2H, br, m), 7.68 (2H, br, d,  $J = 8.5$  Hz), 7.90-8.03 (2H, br, m) ppm;  $^{13}\text{C}$  NMR (500 MHz, DMSO- $d_6$ ):  $\delta = 19.133, 19.912, 23.643, 26.701, 28.655, 29.650, 31.386, 31.813, 38.961, 47.223, 58.484, 60.177, 79.105, 154.067, 171.255, 172.773$  ppm; ESI-MS ( $m/z$ ) = 709.7  $[\text{M} + \text{H}]^+$ , 731.6  $[\text{M} + \text{Na}]^+$ , 747.6  $[\text{M} + \text{K}]^+$ .

### N-Boc-protected 1c:

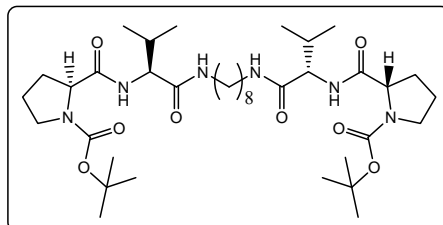

Yield = 85 %; m.p. = 109 °C. IR (KBr)  $\nu = 3307, 2968, 2872, 1703, 1644, 1543$   $\text{cm}^{-1}$ ;  $^1\text{H}$  NMR (500 MHz, DMSO- $d_6$ ):  $\delta = 0.90$  (12 H, br, m), 1.25-1.50 (30H, br, m), 1.75-2.20 (10H, br, m), 2.98-3.16 (4H, br, m), 3.29-3.47 (4H, br, m), 4.13 (2H, dd,  $J = 8.0, 7.8$  Hz), 4.22-4.29 (2H, br, m), 7.67 (2H, br, d,  $J = 7.9$  Hz), 7.87-8.05 (2H, br, m) ppm;  $^{13}\text{C}$  NMR (300 MHz, DMSO- $d_6$ ):  $\delta = 19.111, 19.897, 23.650, 26.915, 28.663, 29.303, 29.607, 31.379, 31.798, 38.984, 47.232, 58.469, 60.163, 79.106, 154.062, 171.228, 172.761$  ppm. ESI-MS ( $m/z$ ) = 737.6  $[\text{M} + \text{H}]^+$ , 759.6  $[\text{M} + \text{Na}]^+$ , 775.7  $[\text{M} + \text{K}]^+$ .

### Synthesis of N-Boc-protected 2:

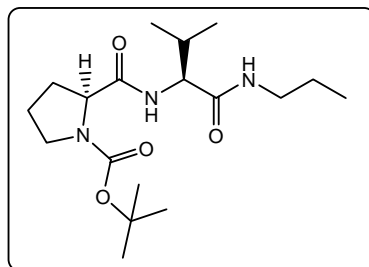

A solution of amino amide (6.32 mmol) in 100 mL of dry DME was added dropwise over a solution of Boc-L-Pro-OSuc (6.57 mmol) in 100 mL of dry DME. The mixture was stirred at room temperature for 24 h and then at 40 °C for 5 h. Solvent was evaporated under vacuum and the resulting white solid was dissolved in 50 mL of dichloromethane and washed with  $\text{NaHCO}_3$  (3 x 15 mL). Afterwards the organic layers were dried ( $\text{Na}_2\text{SO}_4$ ) and the solvent was evaporated under vacuum to yield N-Boc-protected 2c as a white solid.

Yield 84 %; m.p. = 104-105 °C; IR (KBr)  $\nu = 3298, 2966, 2876, 1703, 1647, 1545$   $\text{cm}^{-1}$ ;  $^1\text{H}$  NMR (500 MHz, DMSO- $d_6$ ):  $\delta = 0.86$  (9 H, m), 1.39 (9H, s), 1.41-1.51 (2H, m), 1.77-2.23 (5H, m), 3.02-3.16 (2H, m), 3.32-3.52 (2H, m), 4.11-4.19 (1H, dd,  $J = 8.1, 7.9$  Hz), 4.21-4.31 (1H, m), 7.69 (1H, br, d,  $J = 8.6$  Hz), 7.91-8.06 (1H, br, m) ppm;  $^{13}\text{C}$  NMR (500 MHz, DMSO- $d_6$ ):  $\delta = 12.016, 19.134, 19.927, 22.949, 23.658, 28.647, 31.394, 31.813, 40.877, 47.232, 58.507, 60.201, 79.113, 154.075, 171.309, 172.782$  ppm; ESI-MS ( $m/z$ ) = 356.4  $[\text{M} + \text{H}]^+$ , 378.4  $[\text{M} + \text{Na}]^+$ ,  $[\text{M} + \text{K}]^+$ .

### Synthesis of compounds 1a-c and 2.

N-protected compounds (3.00 mmol) were dissolved in dichloromethane and after addition of 15 mL of TFA the mixture was stirred at room temperature for 2 h. The solvent was evaporated under vacuum and then the resulting crude oil was dissolved in water (50 mL). The solution was treated with NaOH (pH =12), and extracted with

chloroform (3 x 15 mL). The organic layers were washed with water and dried ( $\text{Na}_2\text{SO}_4$ ). Solvent was evaporated under vacuum to yield compounds **1a-c** and **2** as white solids.

### Compound 1a:

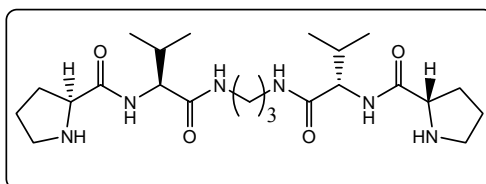

Yield 84 %, m.p. 170 °C; IR (KBr)  $\nu = 3289, 2959, 2870, 1638, 1545 \text{ cm}^{-1}$ ;  $^1\text{H}$  NMR (500 MHz,  $\text{CD}_3\text{CN}$ ):  $\delta = 0.89$  (12 H, dd,  $J = 19.9, 6.8 \text{ Hz}$ ), 1.53-1.60 (4H, m), 1.65-1.72 (4H, m), 1.76-1.84 (2 H, m), 2.02-2.14 (4 H, m), 2.31 (2H, br, s), 2.84-2.88 (2H, m), 3.12-3.20 (4 H, m), 3.69 (2H, dd,  $J = 8.8, 4.8 \text{ Hz}$ ), 4.06 (2H, dd,  $J = 8.8, 5.5 \text{ Hz}$ ), 6.97 (2H, br, s), 8.08 (2H, br, d, 8 Hz) ppm;  $^{13}\text{C}$  NMR (500 MHz,  $\text{CD}_3\text{CN}$ ):  $\delta = 17.171, 19.071, 26.258, 29.264, 30.752, 30.927, 35.986, 47.141, 58.002, 60.916, 171.720, 175.321 \text{ ppm}$ ; ESI-MS ( $m/z$ ) = 234  $[\text{M}+2]^{2+}$   $\text{C}_{23}\text{H}_{42}\text{N}_6\text{O}_4$ .

### Compound 1b:

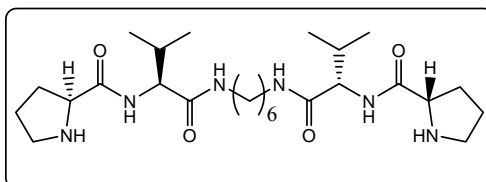

Yield 87 %; m.p. = 190 °C; IR (KBr)  $\nu = 3285, 2956, 2861, 1641, 1541 \text{ cm}^{-1}$ ;  $^1\text{H}$  NMR (500 MHz,  $\text{CD}_3\text{CN}$ ):  $\delta = 0.90$  (12 H, dd,  $J = 19.8, 7 \text{ Hz}$ ), 1.28-1.34 (4H, m), 1.42-1.49 (4H, m), 1.64-1.71 (4 H, m), 1.77-1.84 (2H, m), 2.02-2.10 (4 H, m), 2.22 (2H, br, s), 2.82-2.87 (2H, m), 3.00-3.04 (2H, m), 3.12-3.18 (4H, m) 3.65 (2H, dd,  $J = 4.5, 9.4 \text{ Hz}$ ), 4.09 (2H, dd,  $J = 8.9, 6.0 \text{ Hz}$ ), 6.77 (2H, br, s), 8.08 (2H, br, d,  $J = 6.70 \text{ Hz}$ ) ppm;  $^{13}\text{C}$  NMR (500 MHz,  $\text{CD}_3\text{CN}$ ):  $\delta = 17.333, 19.047, 22.706, 26.061, 26.298, 29.219, 30.875, 31.348, 38.672, 47.209, 57.867, 60.903, 171.289, 175.149 \text{ ppm}$ ; ESI-MS ( $m/z$ ) = 256  $[\text{M}+2]^{2+}$ .

### Compound 1c:

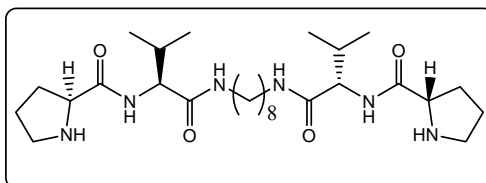

Yield 79 %; m.p. 177 °C; IR (KBr)  $\nu = 3289, 2957, 2854, 1640, 1540 \text{ cm}^{-1}$ ;  $^1\text{H}$  NMR (500 MHz,  $\text{CD}_3\text{CN}$ ):  $\delta = 0.90$  (12 H, dd,  $J = 19.4, 6.9 \text{ Hz}$ ), 1.25-1.36 (8H, m), 1.41-1.50 (4H, m), 1.65-1.72 (4 H, m), 1.78-1.85 (2H, m), 2.03-2.10 (4 H, m), 2.29 (2H, br, s), 2.83-2.88 (2H, m), 3.00-3.04 (2H, m), 3.12-3.19 (4H, m) 3.67 (2H, dd,  $J = 4.6, 9.3 \text{ Hz}$ ), 4.01 (2H, dd,  $J = 9.0, 6.2 \text{ Hz}$ ), 6.77 (2H, br, s), 8.08 (2H, br, d,  $J = 9.04 \text{ Hz}$ ) ppm;  $^{13}\text{C}$  NMR (500 MHz,  $\text{CD}_3\text{CN}$ ):  $\delta = 17.289, 19.087, 22.706, 26.291, 26.467, 28.839, 29.289, 30.836, 31.410, 38.955, 47.217, 57.791, 60.896, 171.188, 175.102 \text{ ppm}$ ; ESI-MS ( $m/z$ ) = 269  $[\text{M}+2]^{2+}$ .

**Compound 2:**

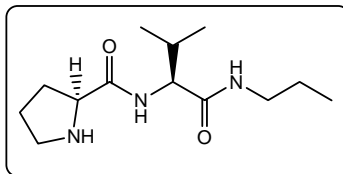

Yield = 79 %; m.p. = 127 °C; IR (KBr)  $\nu$  = 3303, 2963, 2873, 1467, 1518  $\text{cm}^{-1}$ ;  $^1\text{H}$  NMR (500 MHz,  $\text{CD}_3\text{CN}$ ):  $\delta$  = 0.86-0.92 (9 H, m), 1.45-1.52 (2 H, m), 1.66-1.71 (2 H, m), 1.78-1.84 (1 H, m), 2.02-2.10 (2H, m), 2.39 (1H, br, s), 2.83-2.87 (1H, m), 3.00-3.05 (1H, m), 3.07-3.19 (2H, m), 3.67 (1H, dd,  $J$  = 9.2, 5Hz), 4.11 (1 H, dd,  $J$  = 8.9, 6.1 Hz), 6.70 (1H, br, s), 8.07 (1H, br, d,  $J$  = 6.70 Hz) ppm;  $^{13}\text{C}$  NMR (500 MHz,  $\text{CD}_3\text{CN}$ ):  $\delta$  = 10.971, 173.323, 19.032, 22.706, 26.288, 30.878, 31.484, 40.838, 47.205, 57.757, 60.878, 171.231, 175.089 ppm; ESI-MS ( $m/z$ ) = 256  $[\text{M}+\text{H}]^+$ , 278  $[\text{M}+\text{Na}]^+$ .

### Gelation studies.

Typically, the desired amount of the gelator in the corresponding solvent was heated in a screw-capped vial until it was completely dissolved and, afterwards, it was left to cool by two different methods:

#### Spontaneous cooling:

The sample was cooled at room temperature during 24 h and afterwards it was stabilized at r.t. during 12 h.

#### Slow cooling:

The sample was cooled in a thermoregulated bath (0.5 °C / min) and stabilized at r.t. during 12 h.

To determine the minimum gel concentration values reported, 5-20 mmol of the studied compounds were dissolved in 1 mL of hot solvent in a screw-capped cylindrical glass vial (diameter = 2 cm). The formation of a gel was checked by turning the vial upside down. Thus, when, upon vial inversion, all the solvent remains entrapped within the gel and does not fall-down we consider it as a gel (G).

Table S1. Gelation of compounds **1a-c** in different organic solvents after spontaneous cooling at 25 °C.<sup>a</sup>

|                 | <b>1a</b> | <b>1b</b> | <b>1c</b> |
|-----------------|-----------|-----------|-----------|
| Tetrahydrofuran | G (30)    | S         | S         |
| Dimethoxyethane | G (24)    | S         | S         |
| Toluene         | G (50)    | G (7)     | G (11)    |
| Ethyl acetate   | G (6)     | G (7)     | G (9)     |
| Acetonitrile    | G (34)    | G (16)    | G (14)    |

a. G: gel; S: soluble. Minimum gel concentration (mM) in parentheses.

**Scanning Electron Microscopy.** Scanning electron micrographs were taken in a LEO 440I microscope equipped with a digital camera. Samples of the xerogels were prepared by placing the gel on top of a tin plate and, after vacuum drying of the solvent, sputtering with Au/Pd in a Polaron SC7610 Sputter Coater from Fisons Instruments.

**NMR.**  $^1\text{H}$  and  $^{13}\text{C}$  NMR spectra were recorded in a Varian Mercury 300 MHz spectrometer at 30 °C. NOE (1D-NOESY and NOESY) measurements were carried out in a Varian Inova 500 MHz spectrometer. Gel samples were prepared by transferring a hot solution of the gelator in  $\text{CD}_3\text{CN}$  to the NMR tube. Upon cooling to room temperature a gel was formed and the sample obtained was analyzed using the same parameters as for solution NMR (except in the case of NOE experiments where the mixing time for gel samples was 20 ms -to avoid spin diffusion- and for solutions 500 ms).

**Molecular modeling.** The models reported were obtained by molecular mechanics calculations performed with MACROMODEL 8.0 using AMBER\* as force-field and a GB/SA simulation of chloroform as solvent. The structures of the isolated molecules correspond to minimum energy conformers found after exhaustive Monte Carlo conformational search. The models for the aggregates were energetically minimized.

**X-ray powder diffraction.** Data collection was performed at room temperature on a Siemens D5000 diffractometer using  $\text{Cu-K}_\alpha$  radiation. Samples of the powdered solids were placed on a quartz sample holder and data were collected for  $2\theta$  values between  $3^\circ$  and  $35^\circ$  with a step size of  $0.05^\circ$  and a time step of 20 s.

**CD spectroscopy.** CD spectra were recorded in a Jasco J-810 spectropolarimeter equipped with a Peltier heating device. The samples were prepared in quartz cuvettes of 1 mm and 0.5 mm of path length.

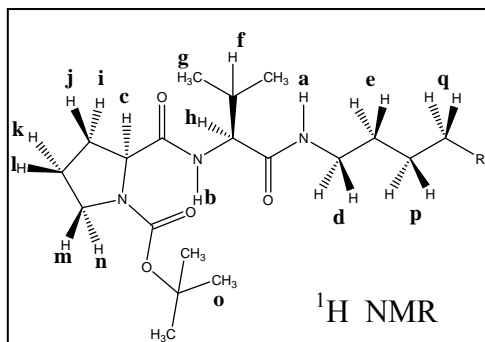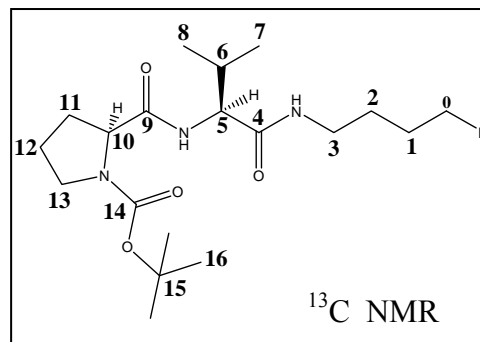

**N-Boc-protected 1a.**

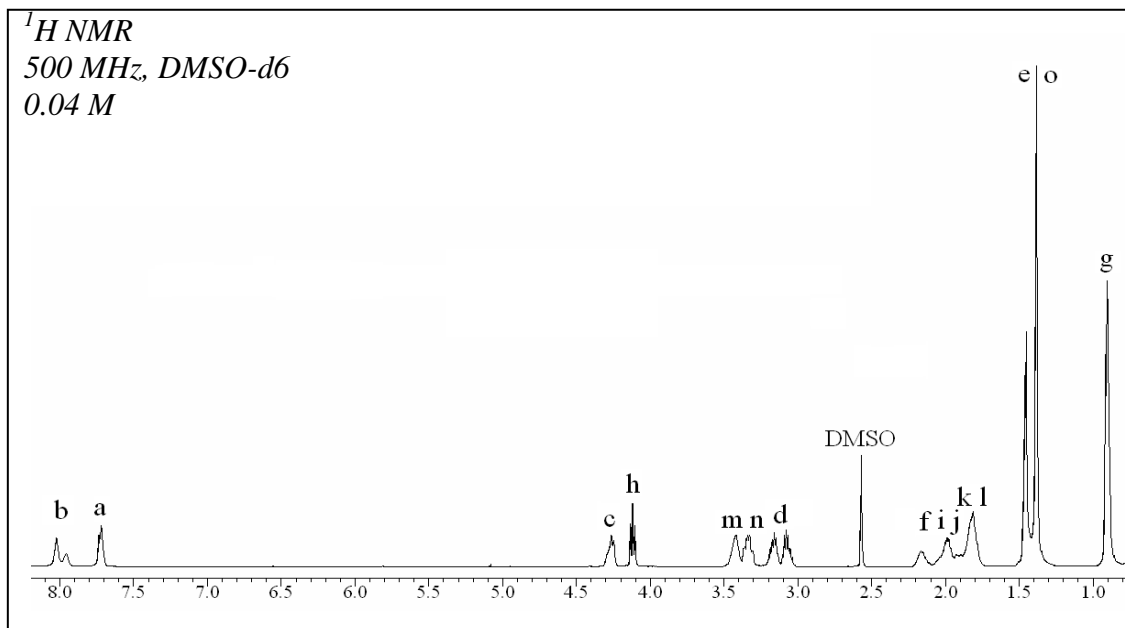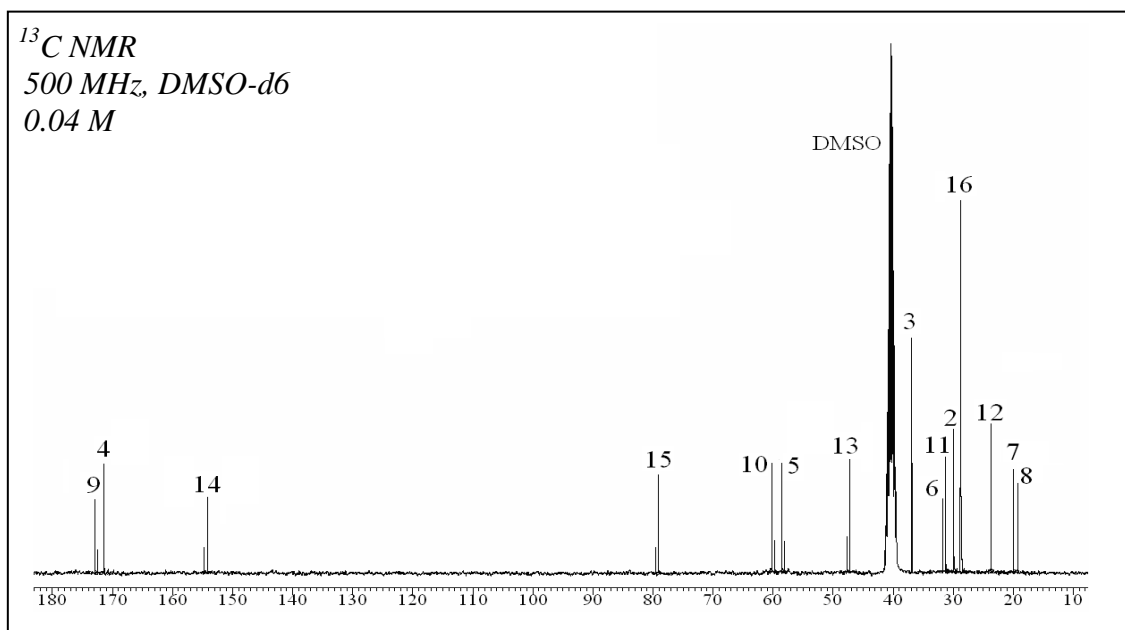



N-Boc-protected 1b.

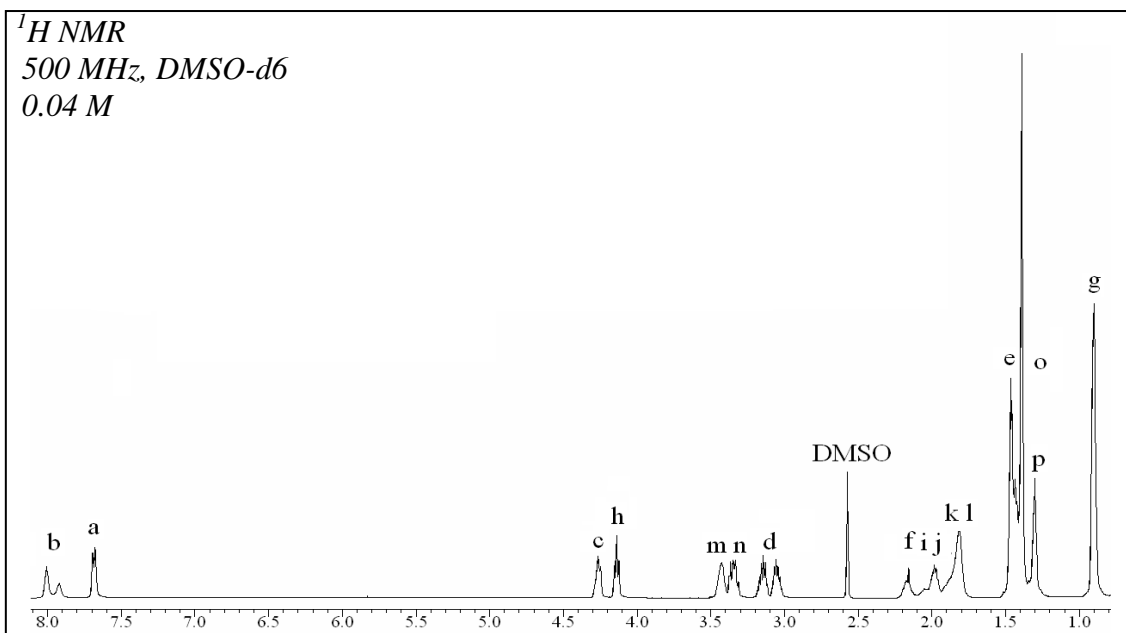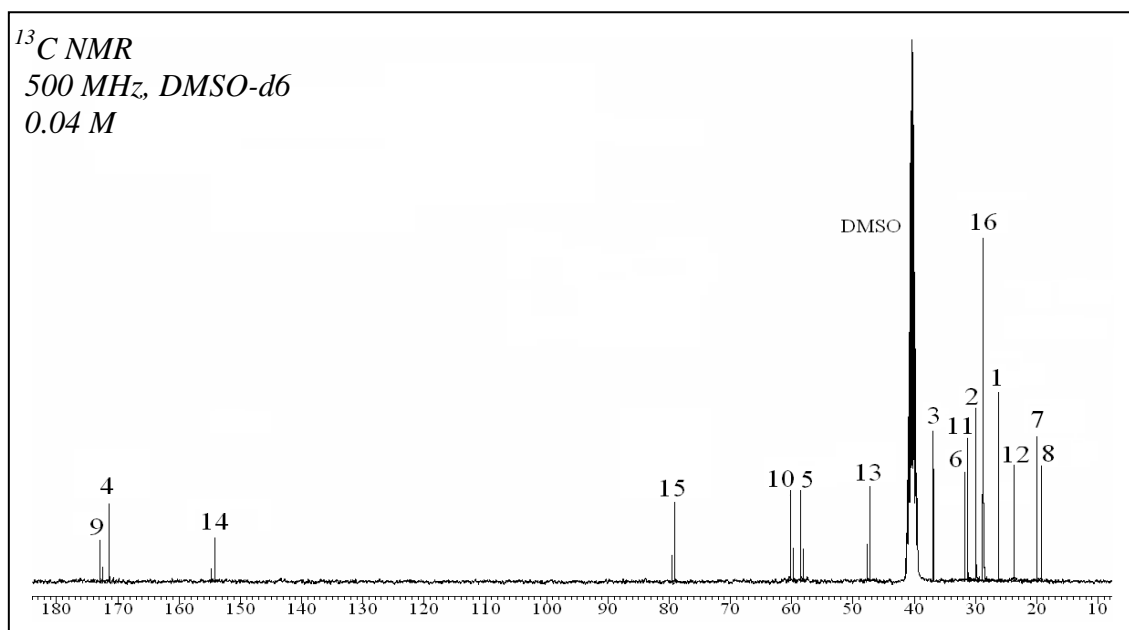

N-Boc-protected 1c.

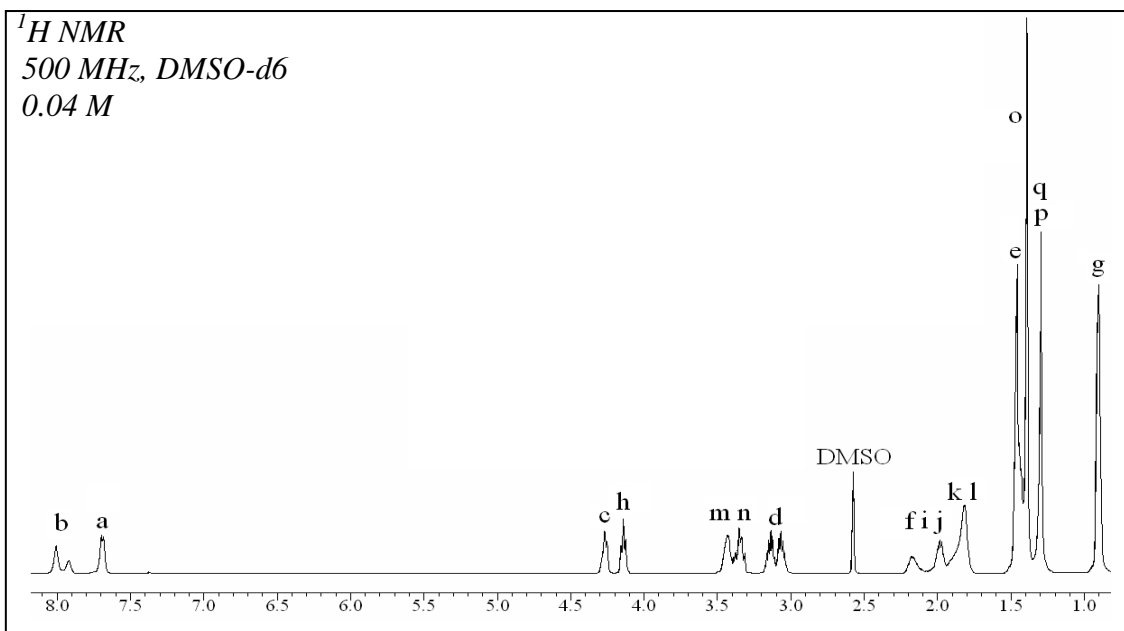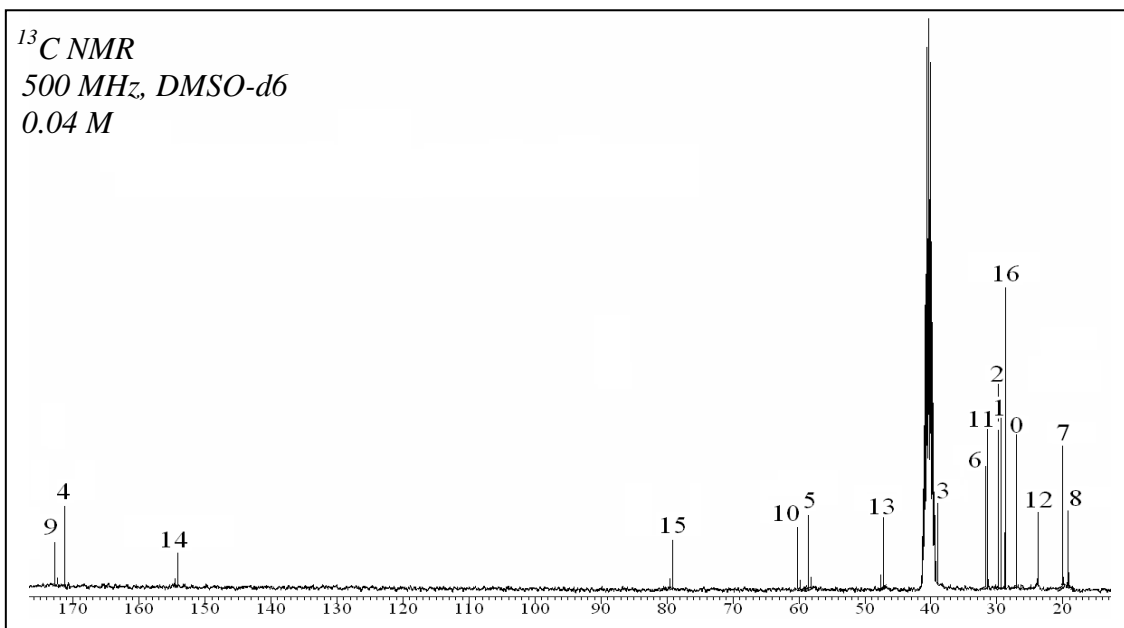

N-Boc-protected 2.

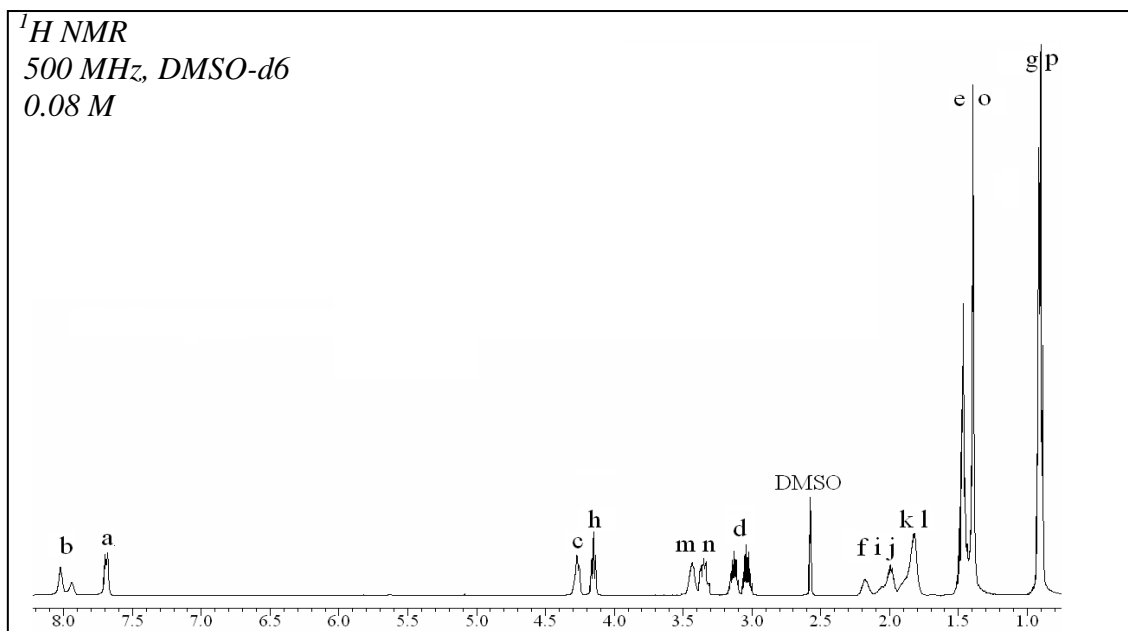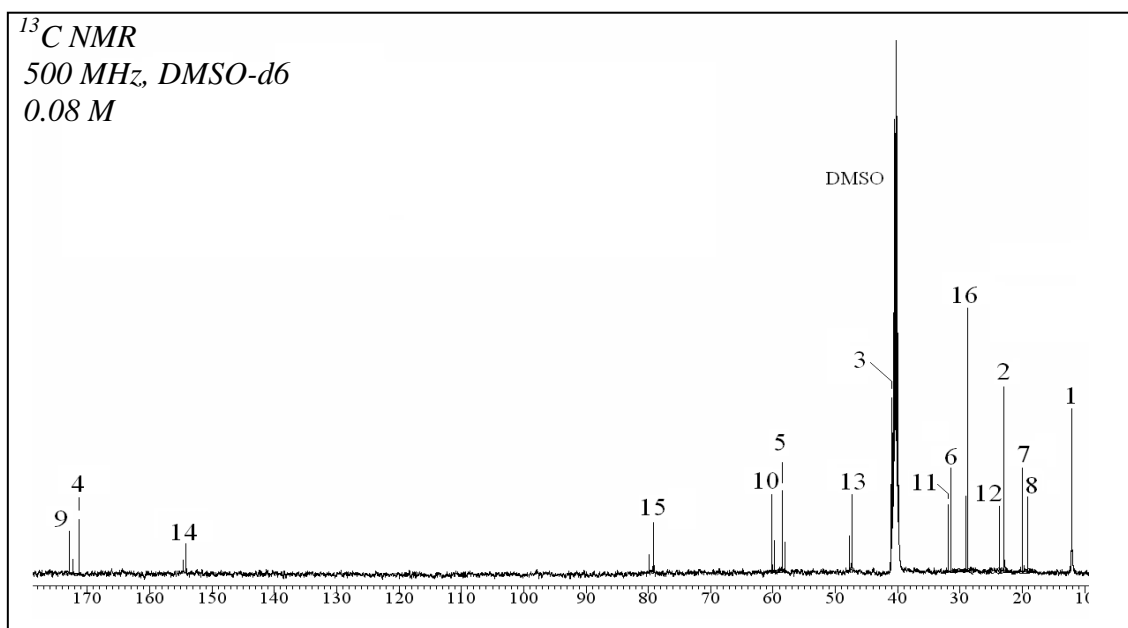

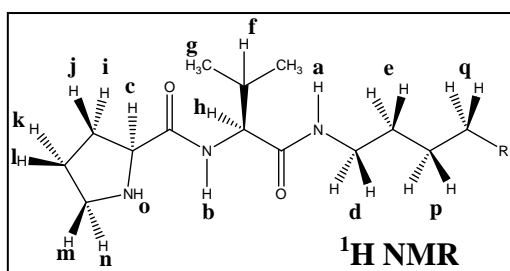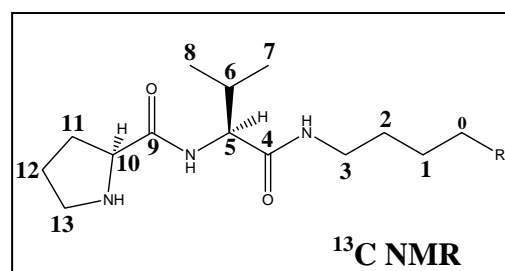

**Compound 1a:**

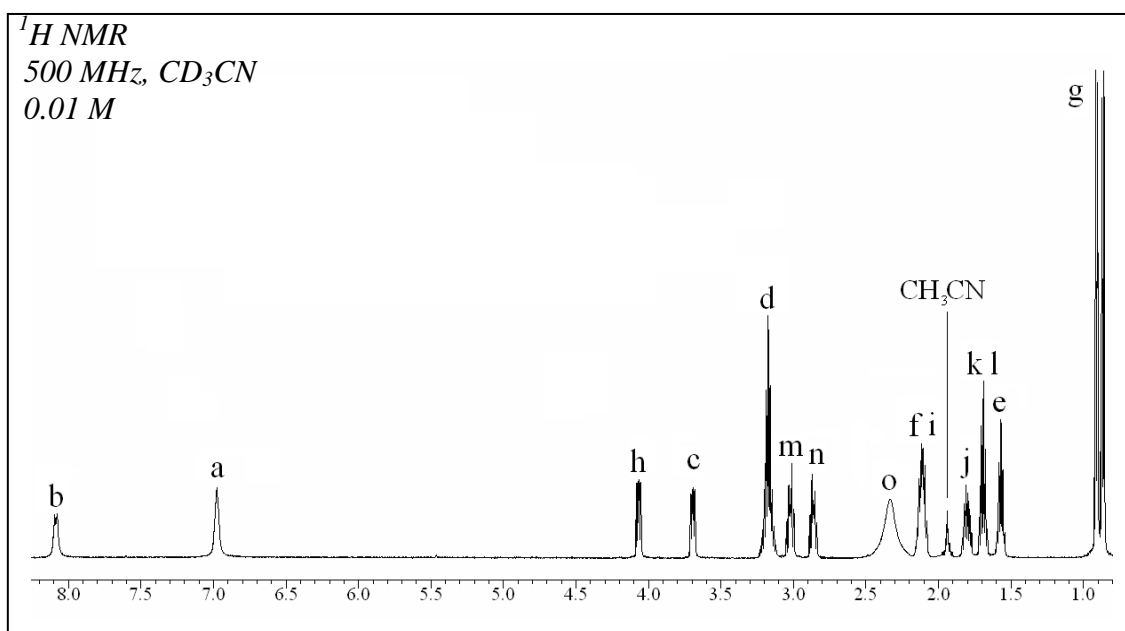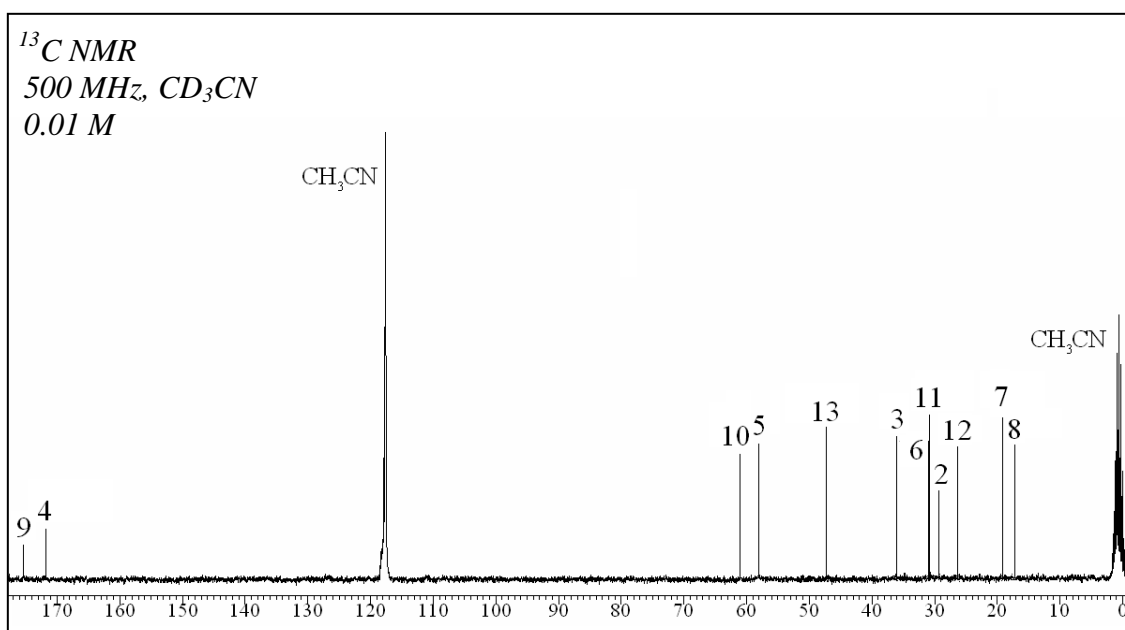

**Compound 1b:**

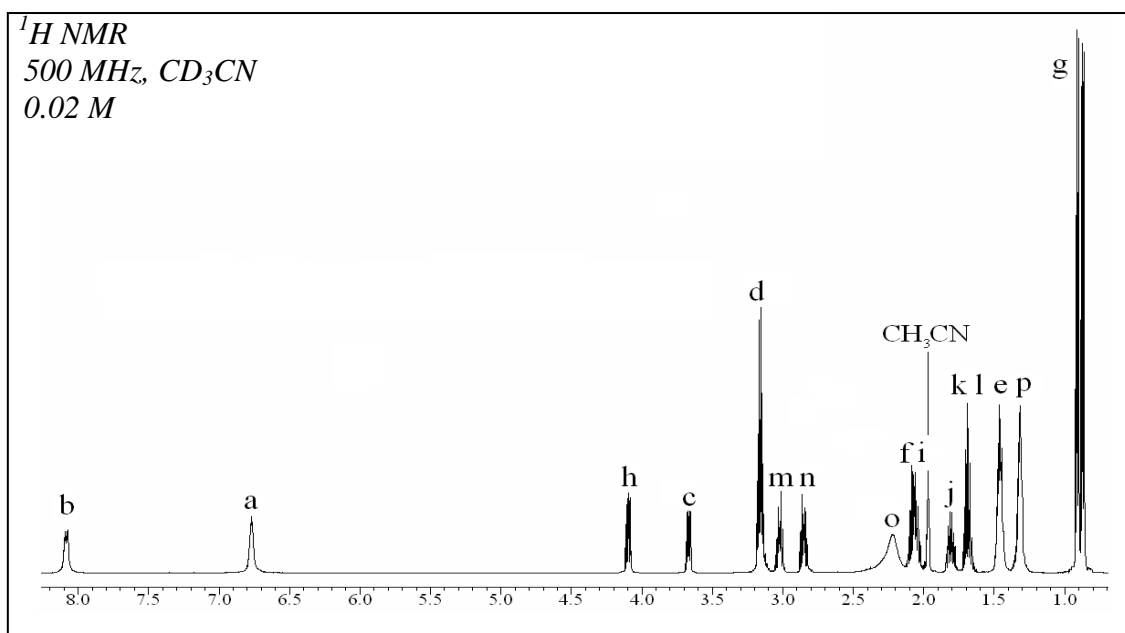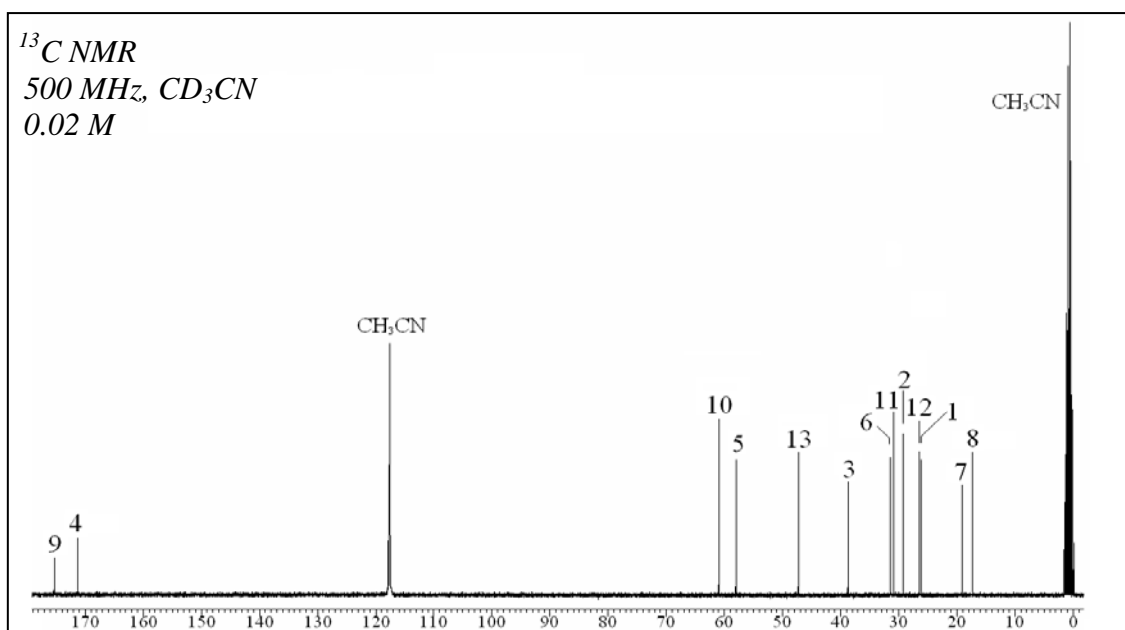

**Compound 1c:**

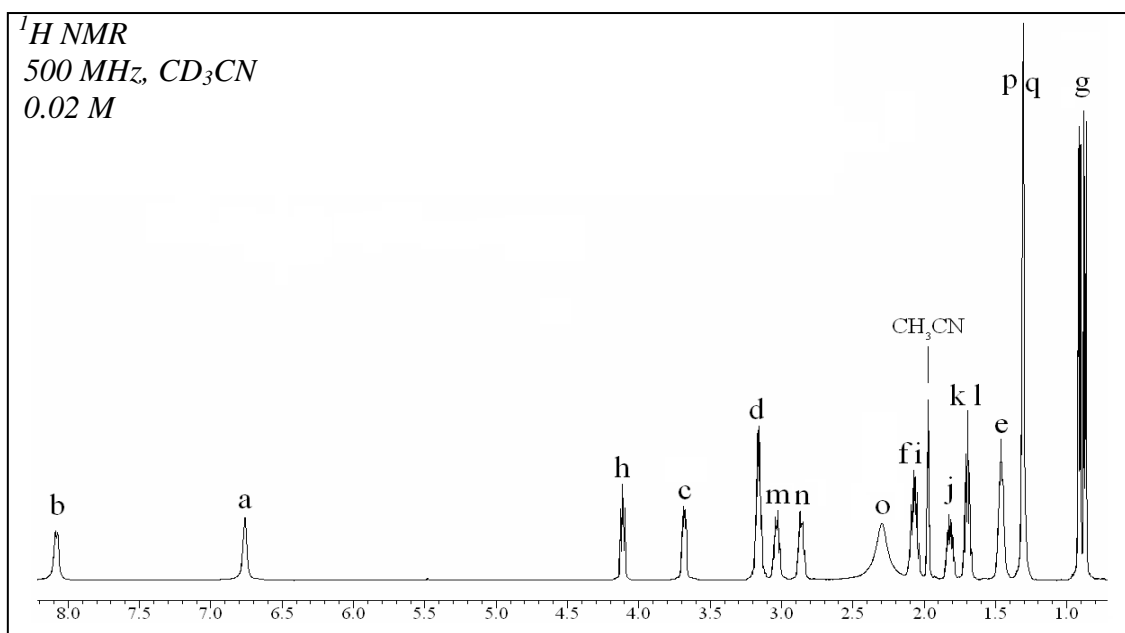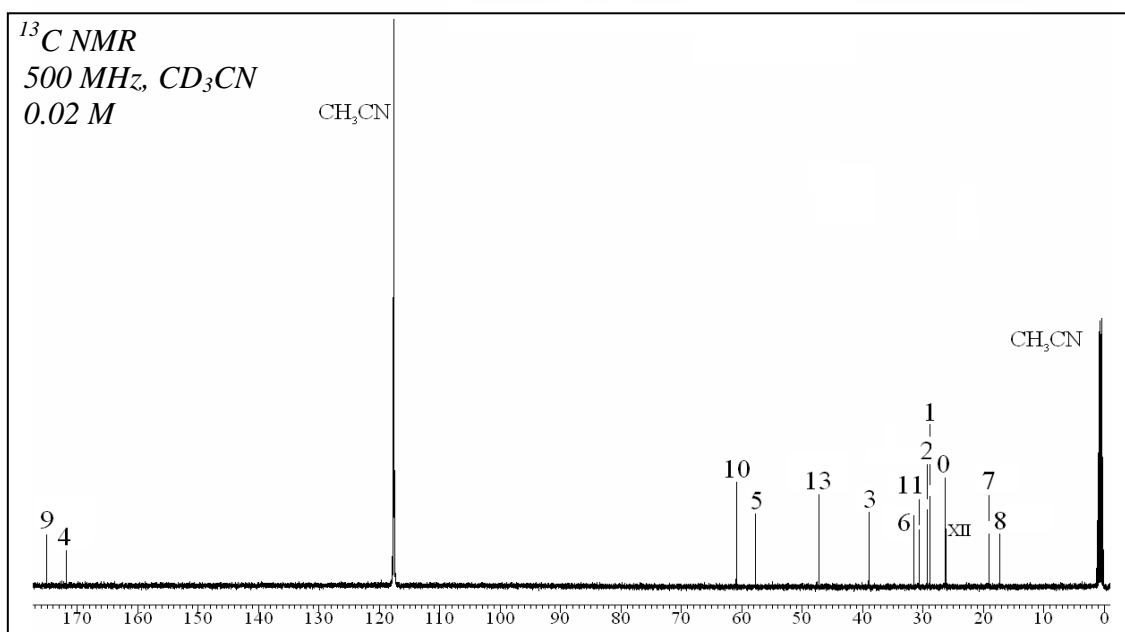

**Compound 1d:**

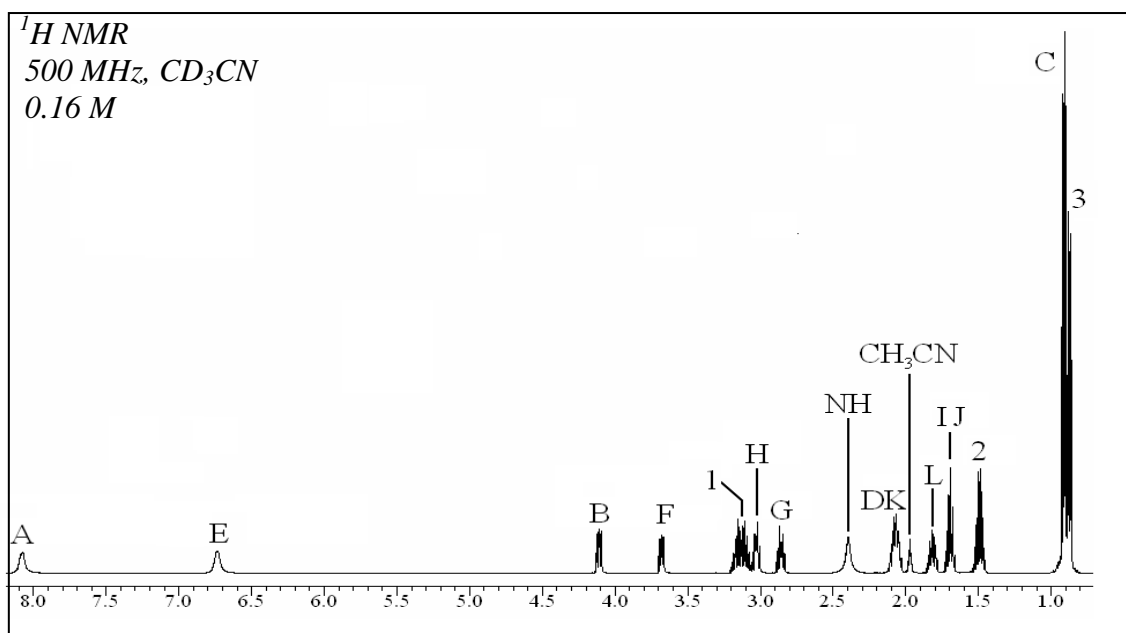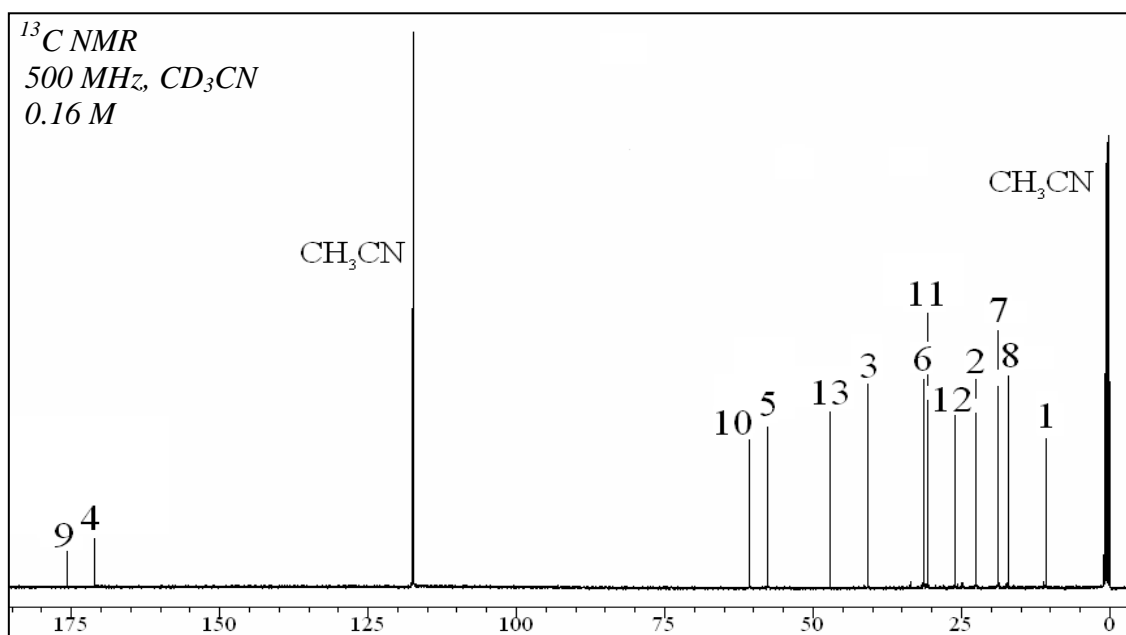

$^1\text{H}$ -RMN  
 $\text{CD}_3\text{CN}$

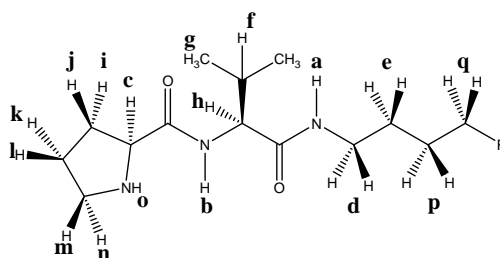

|        | Compound 1a<br>0.002 M | Compound 1b<br>0.001 M | Compound 1c<br>0.002 M | Compound 2<br>0.004 M |
|--------|------------------------|------------------------|------------------------|-----------------------|
| Signal | $\delta$ (ppm)         | $\delta$ (ppm)         | $\delta$ (ppm)         | $\delta$ (ppm)        |
| a      | 6.98                   | 6.71                   | 6.72                   | 6.61                  |
| b      | 8.09                   | 8.07                   | 8.07                   | 8.04                  |
| c      | 3.67                   | 3.67                   | 3.69                   | 3.68                  |
| d      | 3.17                   | 3.15                   | 3.16                   | 3.13                  |
| e      | 1.54                   | 1.45                   | 1.46                   | 1.49                  |
| f      | 2.08                   | 2.05                   | 2.07                   | 2.05                  |
| g      | 0.89                   | 0.90                   | 0.87                   | 0.90                  |
| h      | 4.05                   | 4.08                   | 4.10                   | 4.10                  |
| i      | 2.08                   | 2.05                   | 2.07                   | 2.05                  |
| j      | 1.78                   | 1.80                   | 1.82                   | 1.80                  |
| k      | 1.67                   | 1.69                   | 1.70                   | 1.69                  |
| l      | 1.67                   | 1.69                   | 1.70                   | 1.69                  |
| m      | 3.00                   | 3.02                   | 3.04                   | 3.02                  |
| n      | 2.87                   | 2.85                   | 2.87                   | 2.84                  |
| o      | 2.15                   | 2.15                   | 2.18                   | 2.15                  |
| p      | ---                    | 1.32                   | 1.30                   | 0.87                  |
| q      | ---                    | ---                    | 1.30                   | ---                   |



$^{13}\text{C}$ -RMN  $\text{CD}_3\text{CN}$

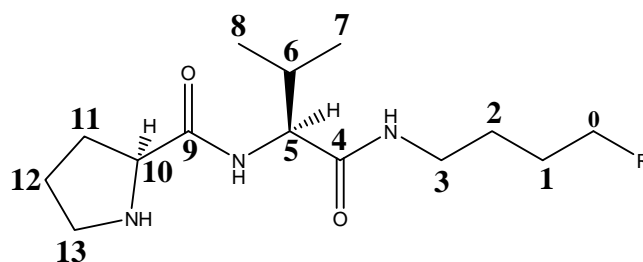

|        | Compound 1a<br>0.004 M | Compound 1b<br>0.004 M | Compound 1c<br>0.004 M | Compound 2<br>0.004 M |
|--------|------------------------|------------------------|------------------------|-----------------------|
| Signal | $\delta$ (ppm)         | $\delta$ (ppm)         | $\delta$ (ppm)         | $\delta$ (ppm)        |
| 0      | ---                    | ---                    | 26.467                 | ---                   |
| 1      | ---                    | 26.061                 | 28.839                 | 10,927                |
| 2      | 29.278                 | 29.219                 | 29,289                 | 22,694                |
| 3      | 35.973                 | 38.672                 | 38,955                 | 40,820                |
| 4      | 171.715                | 171.289                | 171,188                | 171,193               |
| 5      | 58.003                 | 57.867                 | 57,791                 | 57,830                |
| 6      | 30.929                 | 31.348                 | 31,410                 | 31,382                |
| 7      | 19.073                 | 19.047                 | 19,089                 | 19,015                |
| 8      | 17.167                 | 17.333                 | 17,289                 | 17,249                |
| 9      | 175.278                | 175.149                | 175,102                | 174,854               |
| 10     | 60.923                 | 60.903                 | 60,896                 | 60,850                |
| 11     | 30.753                 | 30.875                 | 30,836                 | 30,835                |
| 12     | 26.261                 | 26.298                 | 26,291                 | 26,237                |
| 13     | 47.149                 | 47.209                 | 47,217                 | 47,201                |

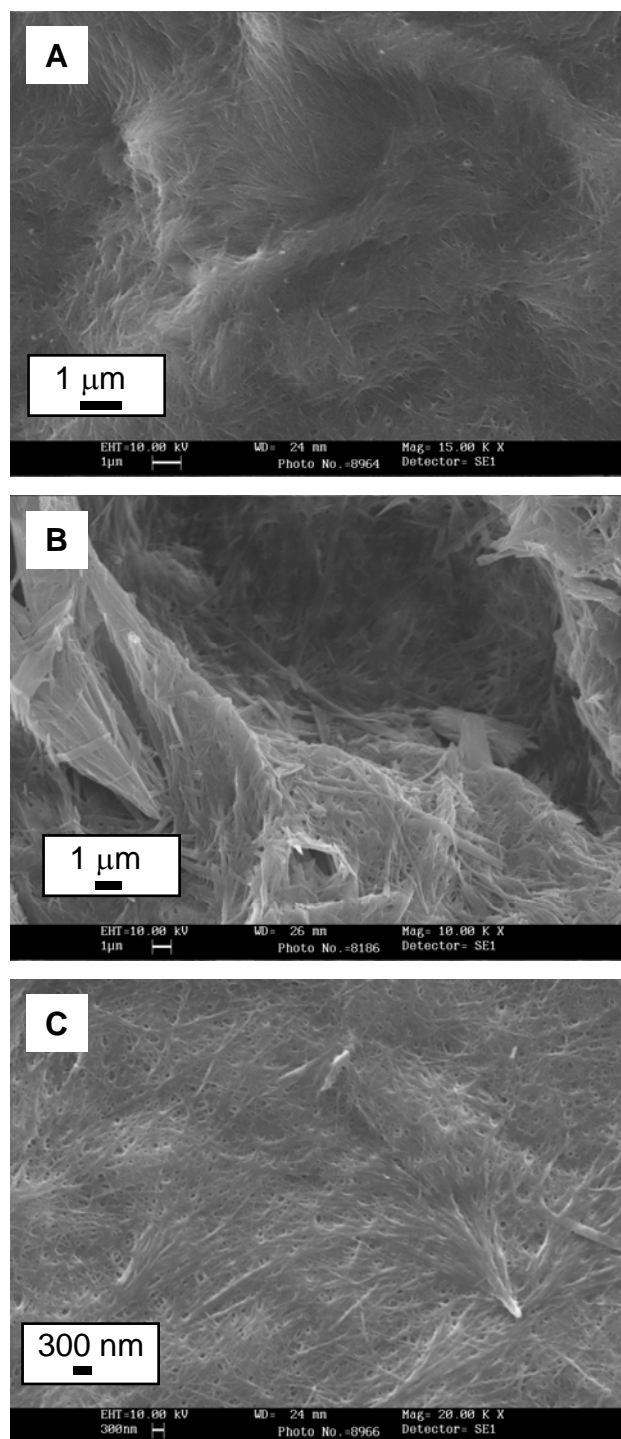

Figure S1. SEM images of xerogels of compound **1b**: A)  $\text{CH}_3\text{CN}$ , spontaneous cooling; B) *idem*, slow cooling; C) toluene, spontaneous cooling.

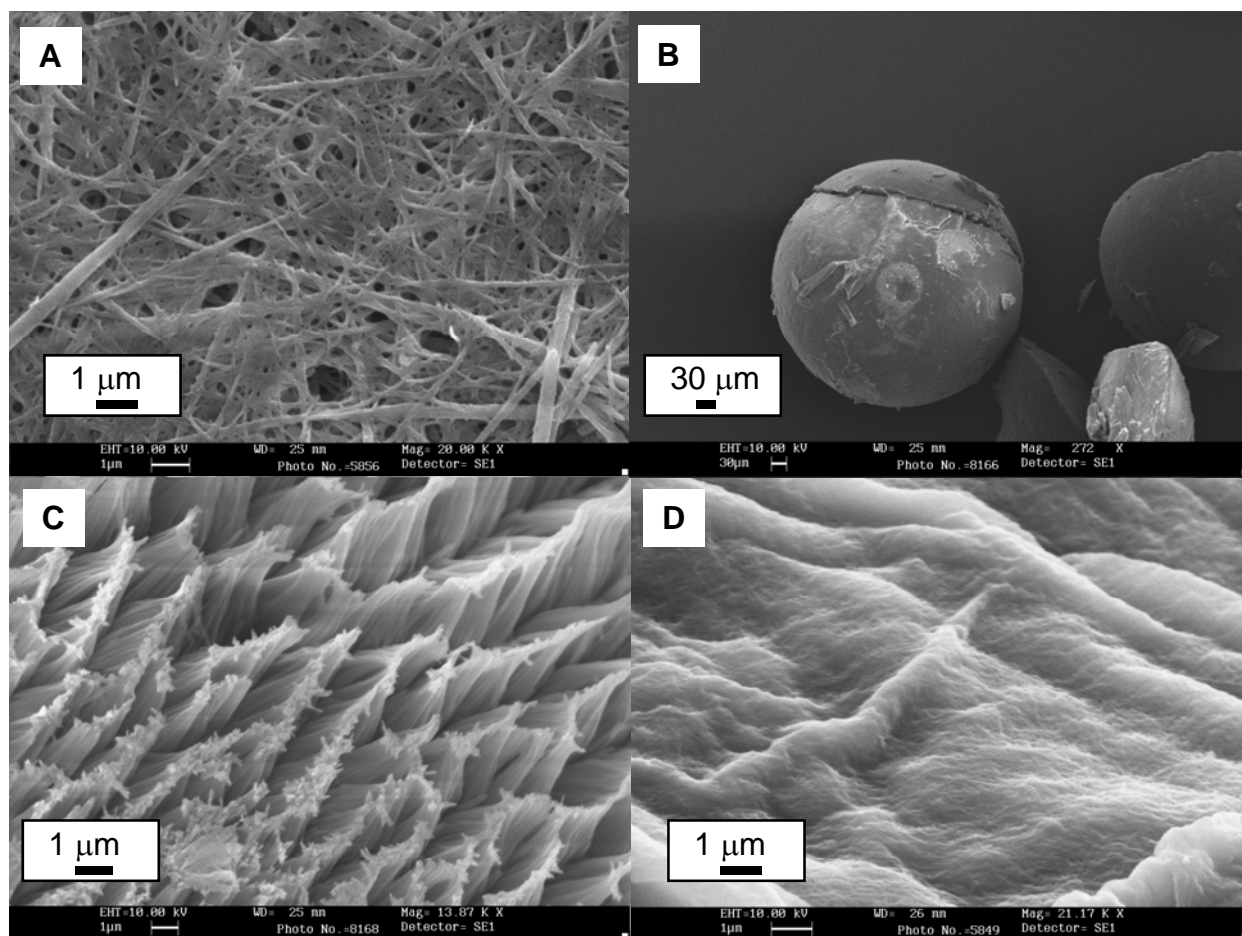

Figure S2. SEM images of xerogels and crystalline precipitates of compound **1c**: A) CH<sub>3</sub>CN, spontaneous cooling; B,C) *idem*, slow cooling; D) EtOAc, spontaneous cooling.

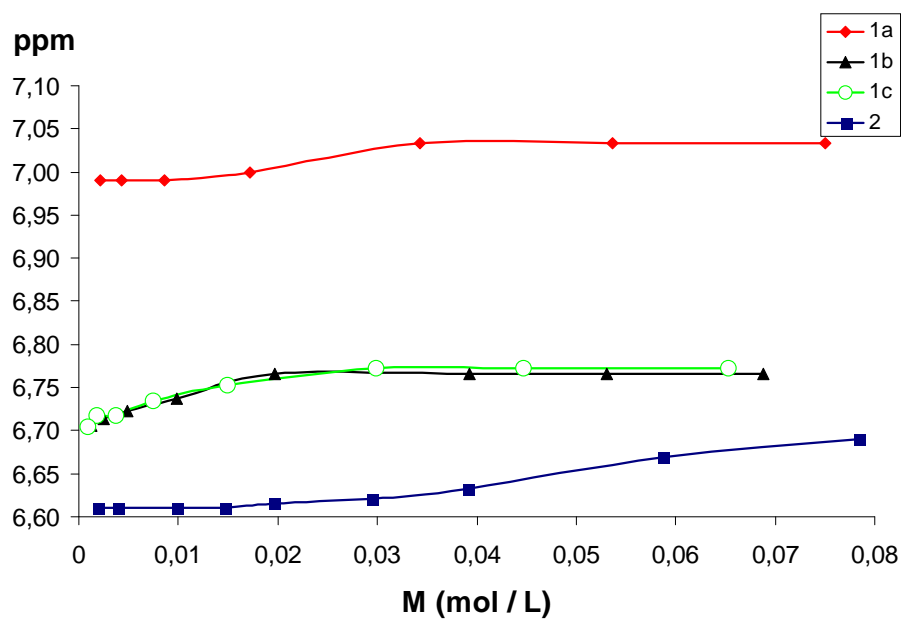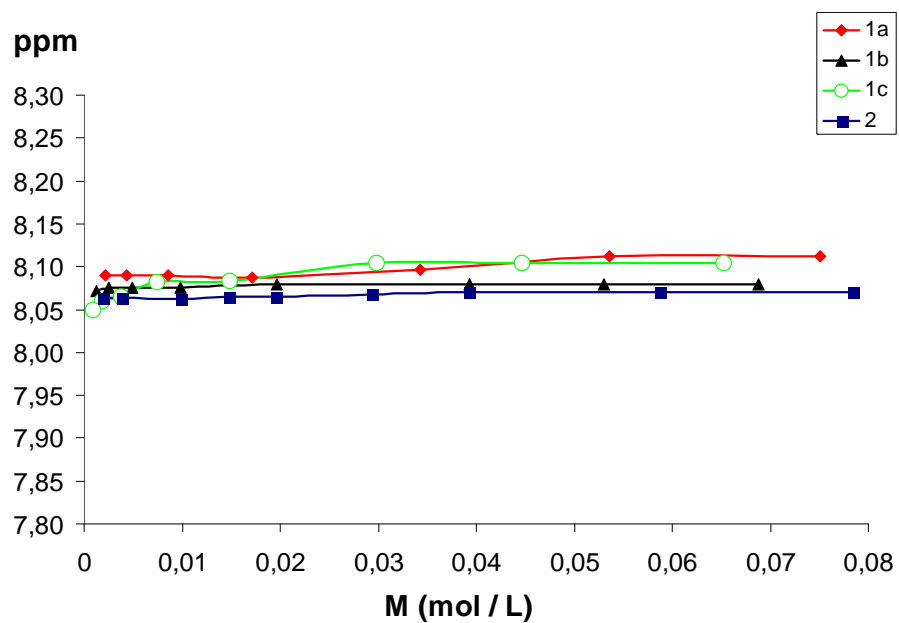

Figure S3.  $\Delta\delta$  vs concentration for the amide signals **a** and **b** of compounds **1a-c** and **2** ( $\text{CD}_3\text{CN}$ ,  $30^\circ\text{C}$ )

## Compound 1a

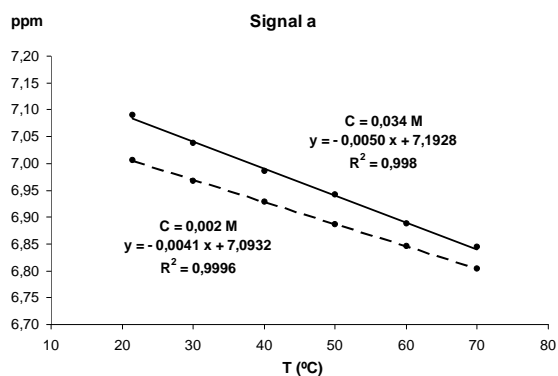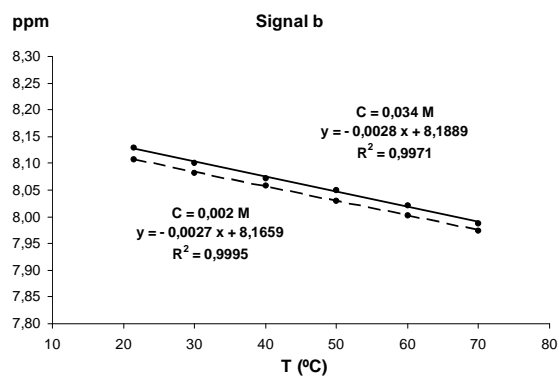

## Compound 1b

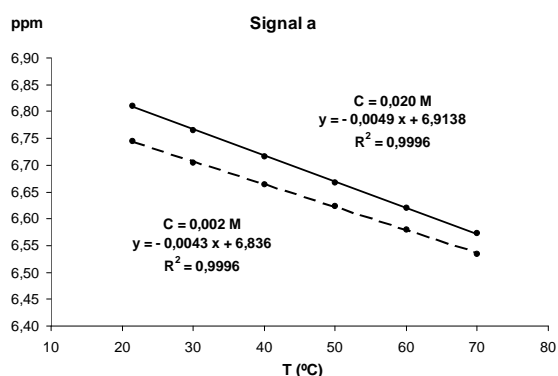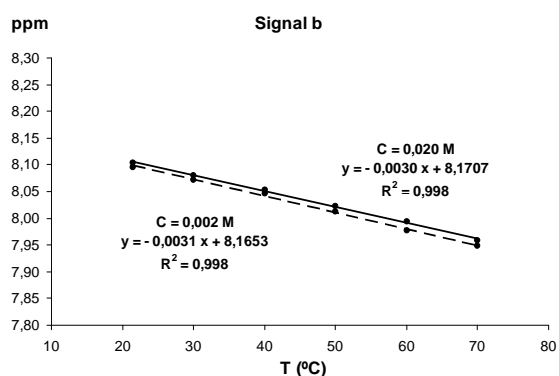

## Compound 1c

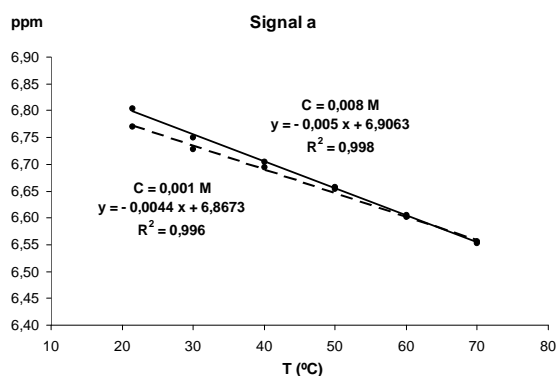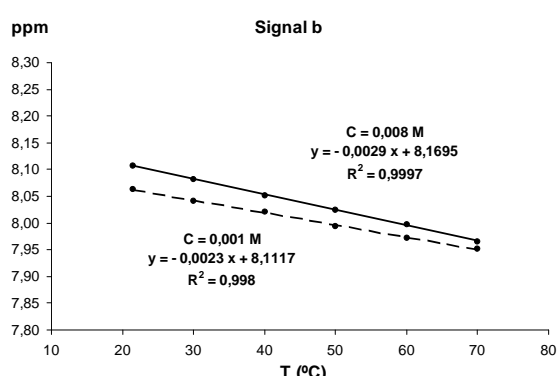

## Compound 2

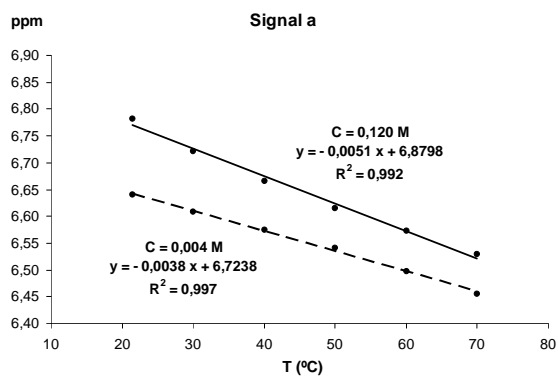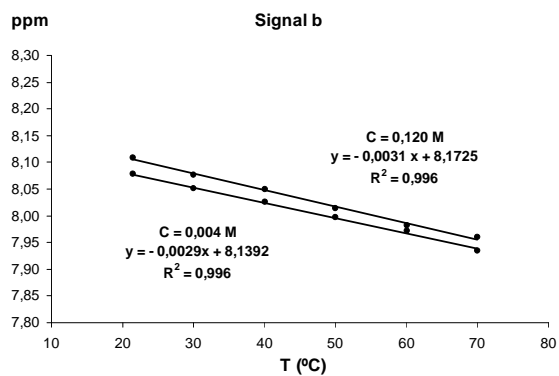

Figure S4.  $\Delta\delta$  vs temperature for the amide signals **a** and **b** of compounds **1a-c** and **2** ( $\text{CD}_3\text{CN}$ ,  $30^\circ\text{C}$ )

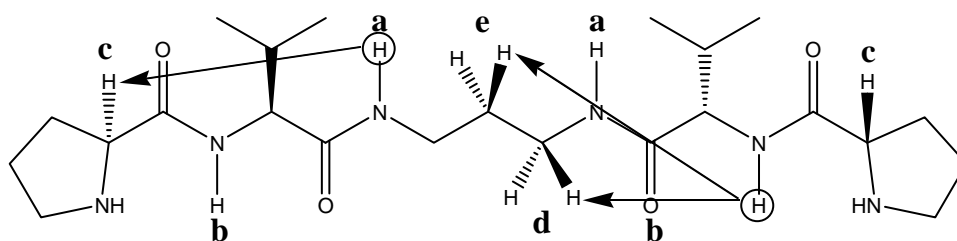

Figure S5. Informative NOE contacts for non-aggregated solutions of compounds **1a** ( $\text{CD}_3\text{CN}$ , 30 °C)

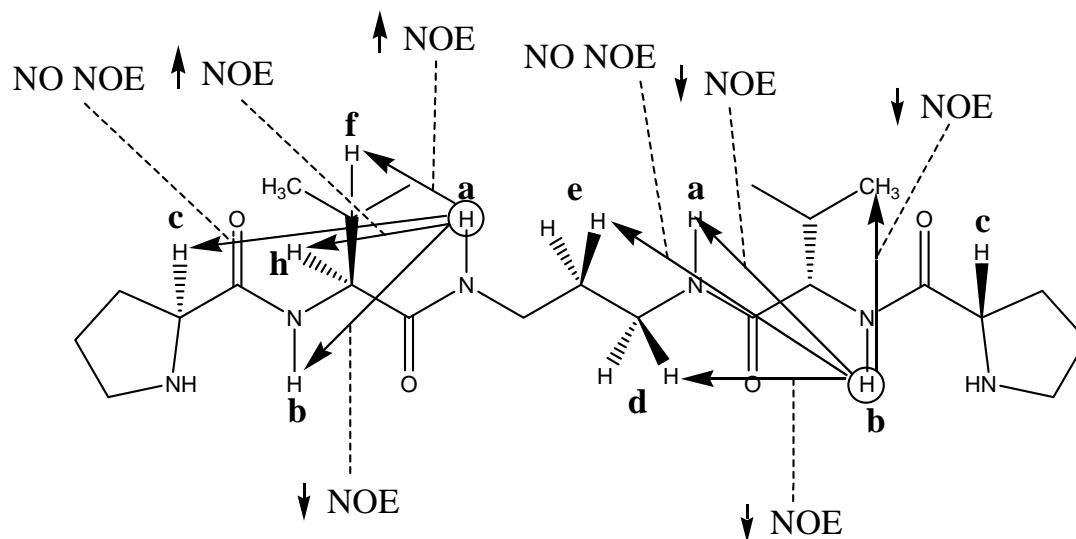

Figure S6. Transfer-NOE contacts for gels of compounds **1a** ( $\text{CD}_3\text{CN}$ , 30 °C). Arrows indicate variations from diluted solution.

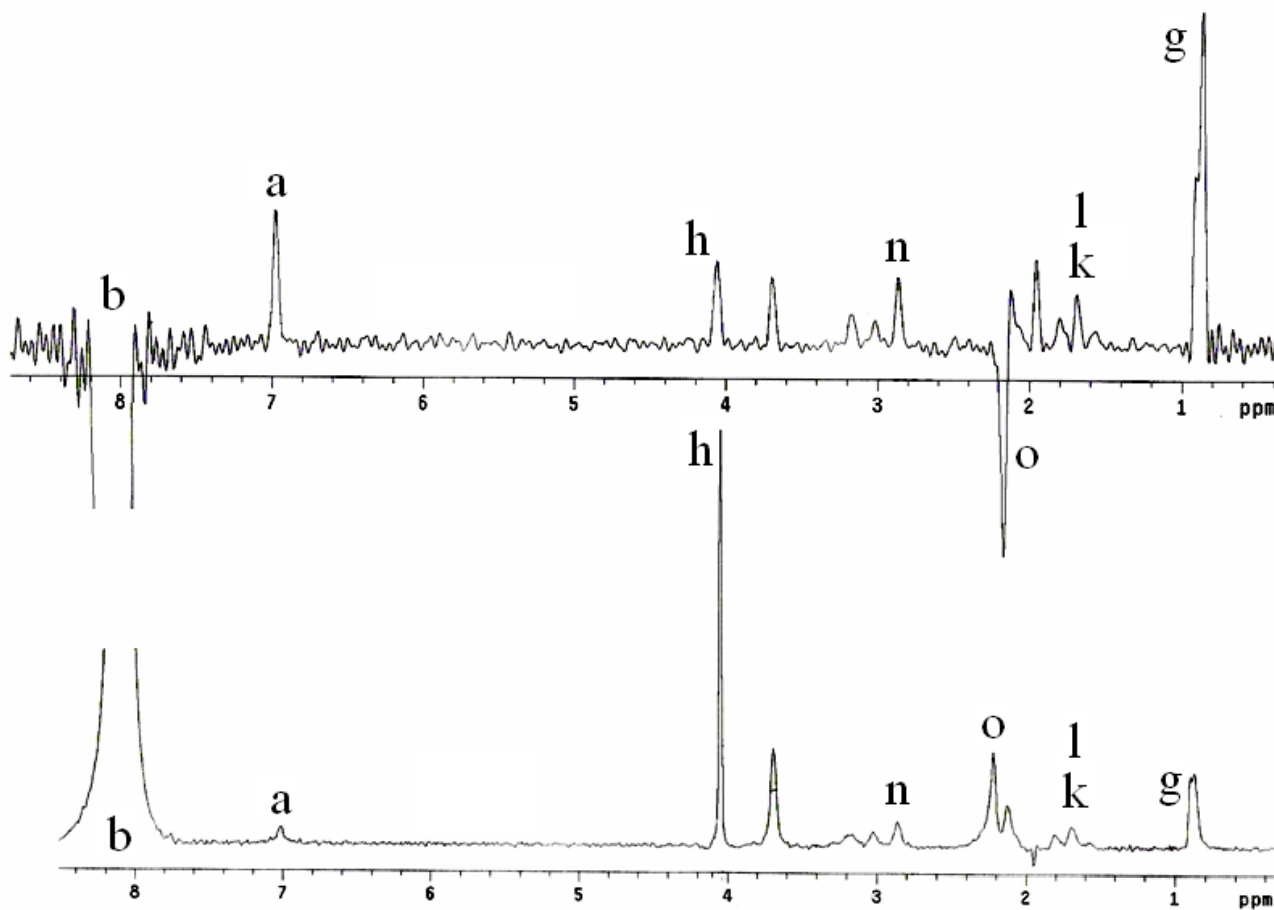

Figure S7. NOE spectra for a non-aggregated solution (top) and a gel (bottom) of compound **1a** ( $\text{CD}_3\text{CN}$ , 30 °C).

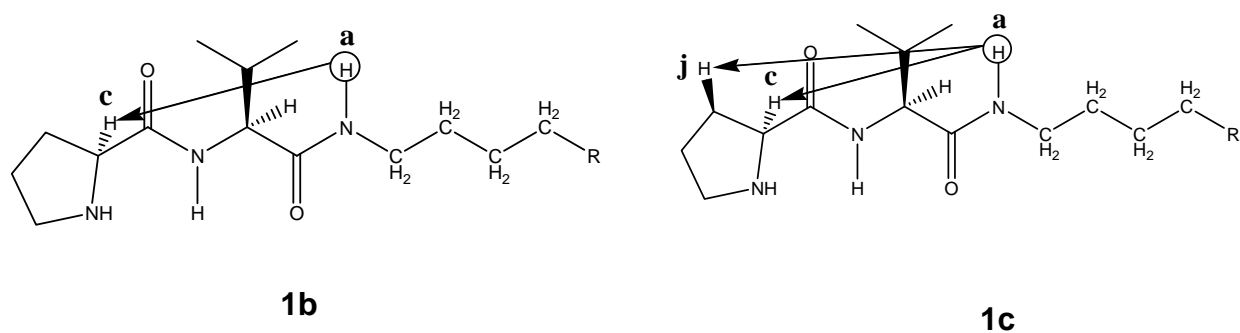

Figure S8. informative NOE contacts for non-aggregated solutions of compounds **1b - c** ( $\text{CD}_3\text{CN}$ , 30 °C)

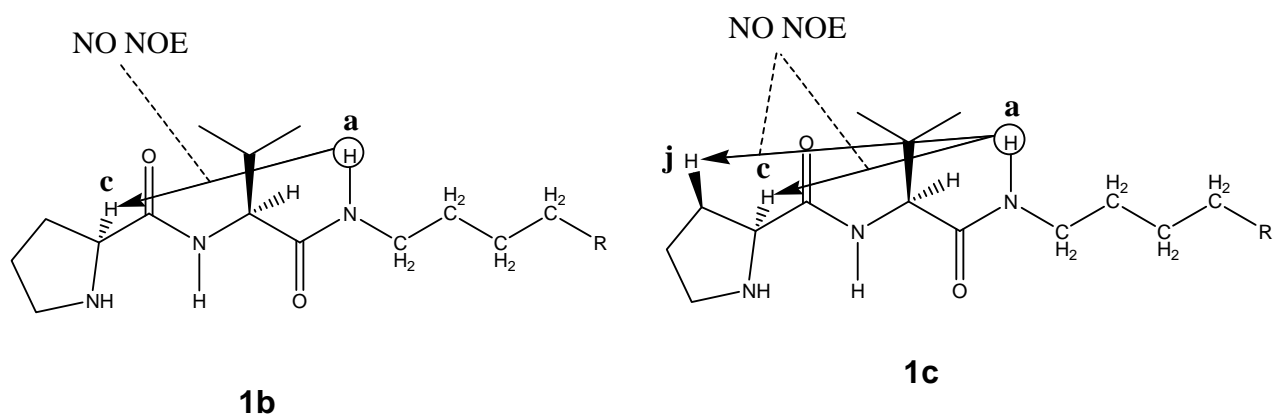

Figure S9. Changes in-NOE contacts for gels of compounds **1b-c** ( $\text{CD}_3\text{CN}$ , 30 °C)



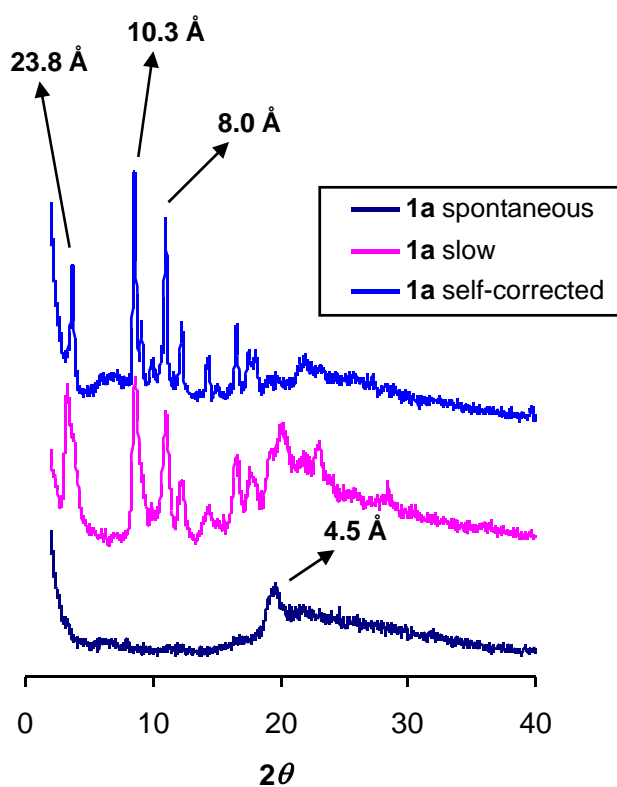

Figure S10. WAXD patterns of xerogels of compound **1a**.

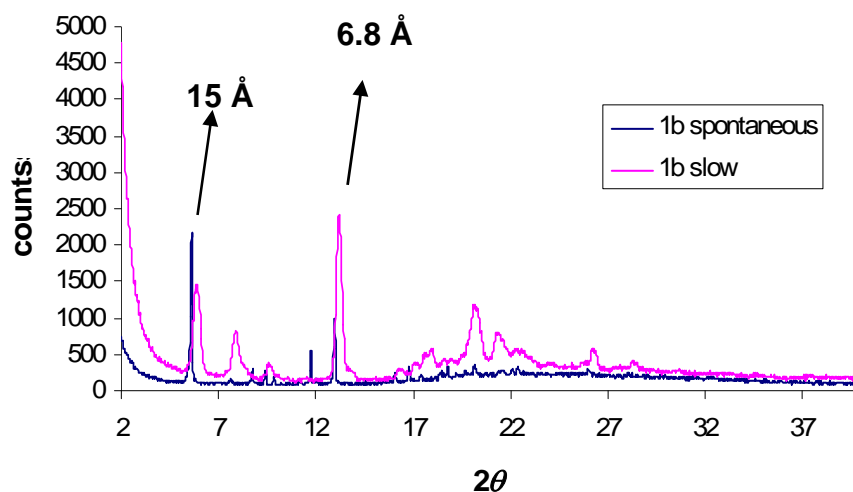

Figure S11. WAXD patterns of compound **1b**.

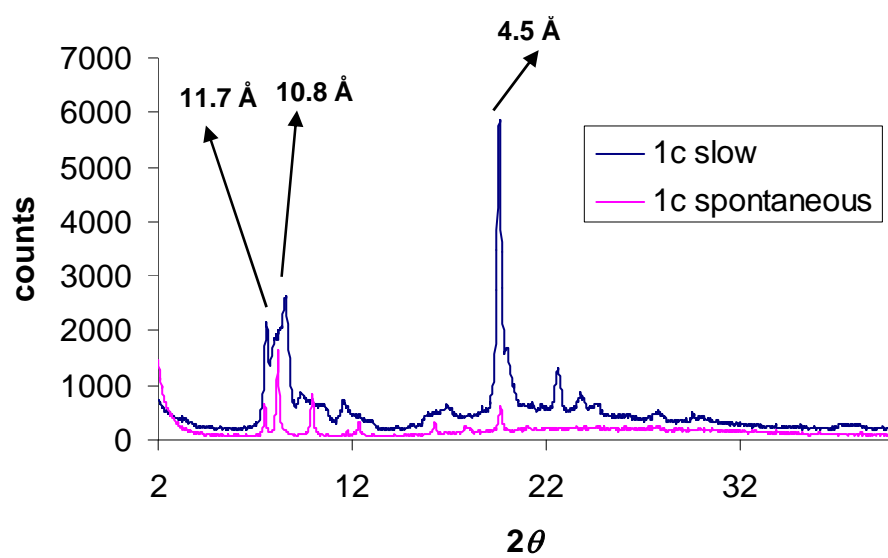

Figure S12. WAXD patterns of compound **1c**.

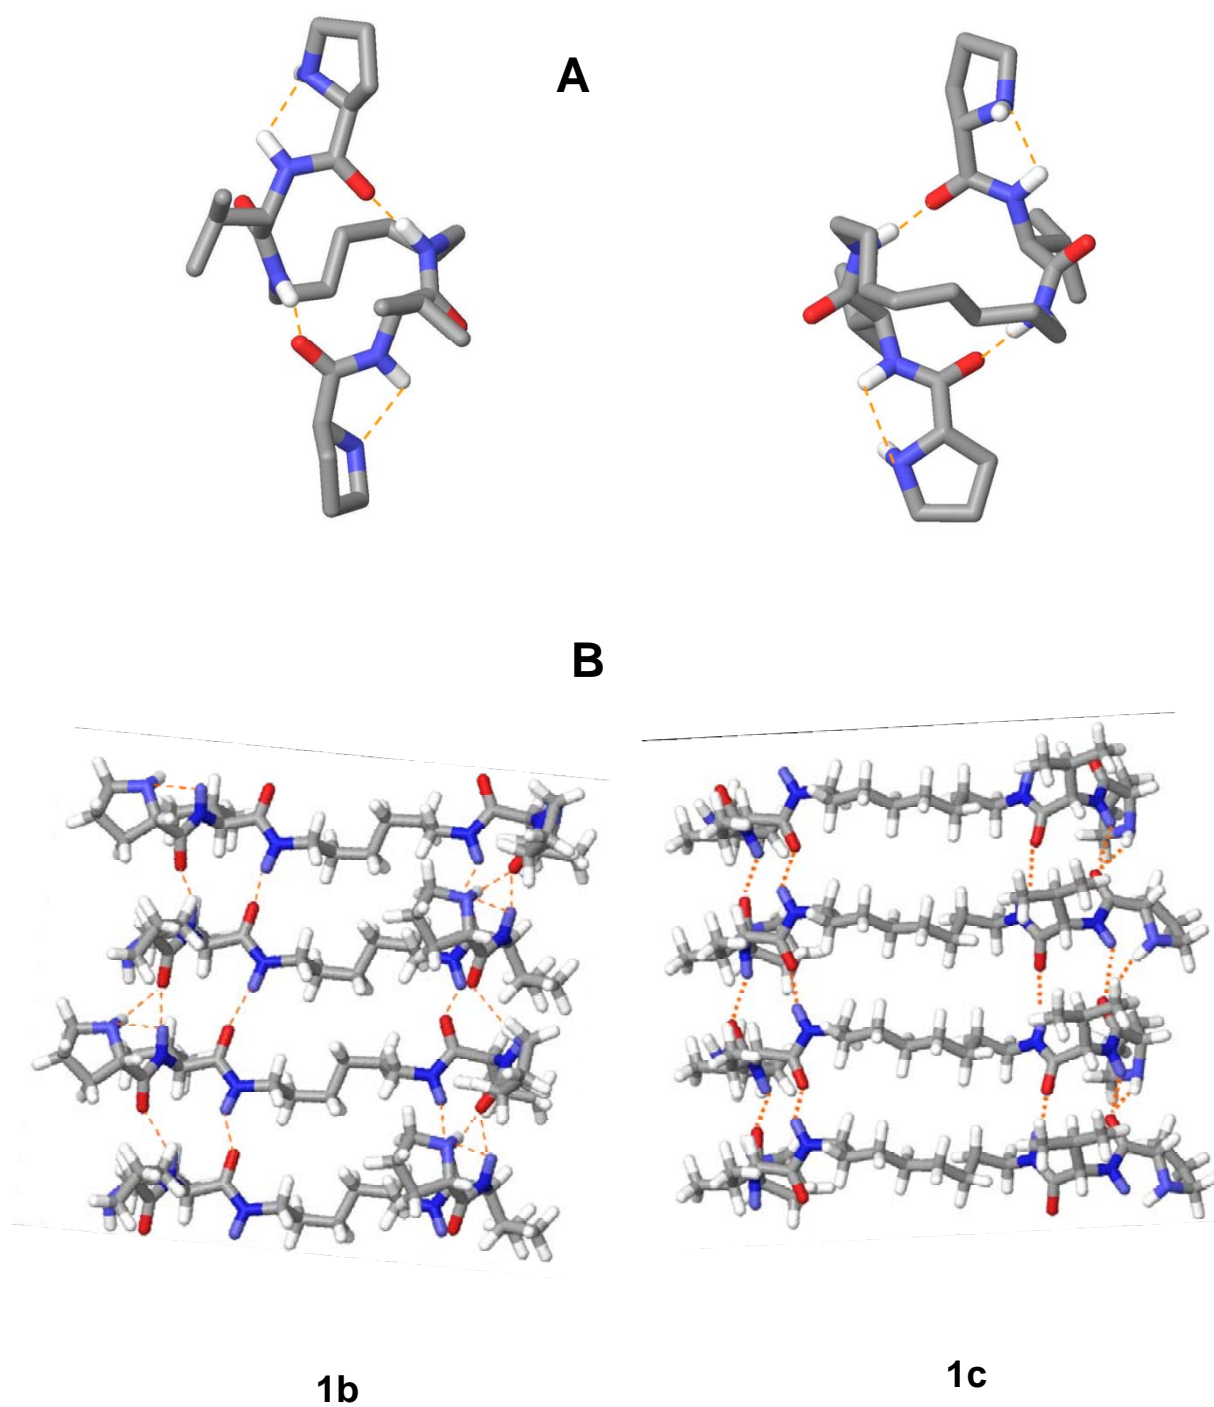

Figure S13. Molecular models for compounds **1b** and **1c** in solution (A) and in aggregates (B). (Macromodel 9, AMBER\*, CHCl<sub>3</sub>)
